# Supplementary material
Source: Springer Nature journal article supplement (https://www.springermedizin.de/resource/supplementary/12958_2010_703_MOESM3_ESM.pdf/9568628)

## Mean ( $\pm$ SD) of the % of motile sperm cells

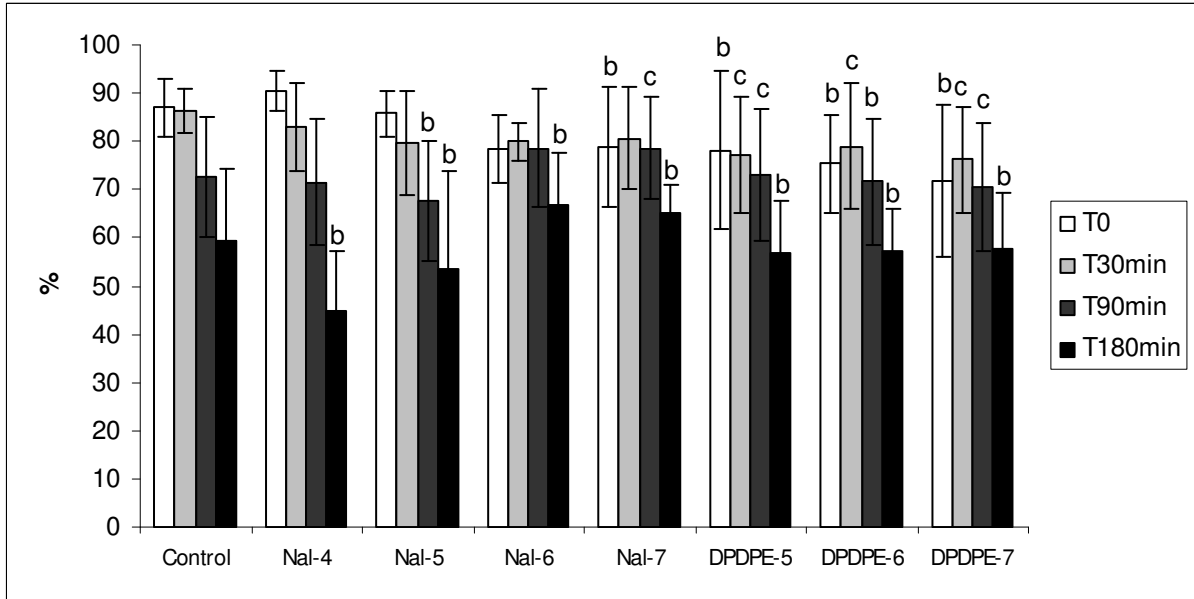

## Mean ( $\pm$ SD) of the % of progressive motile sperm cells

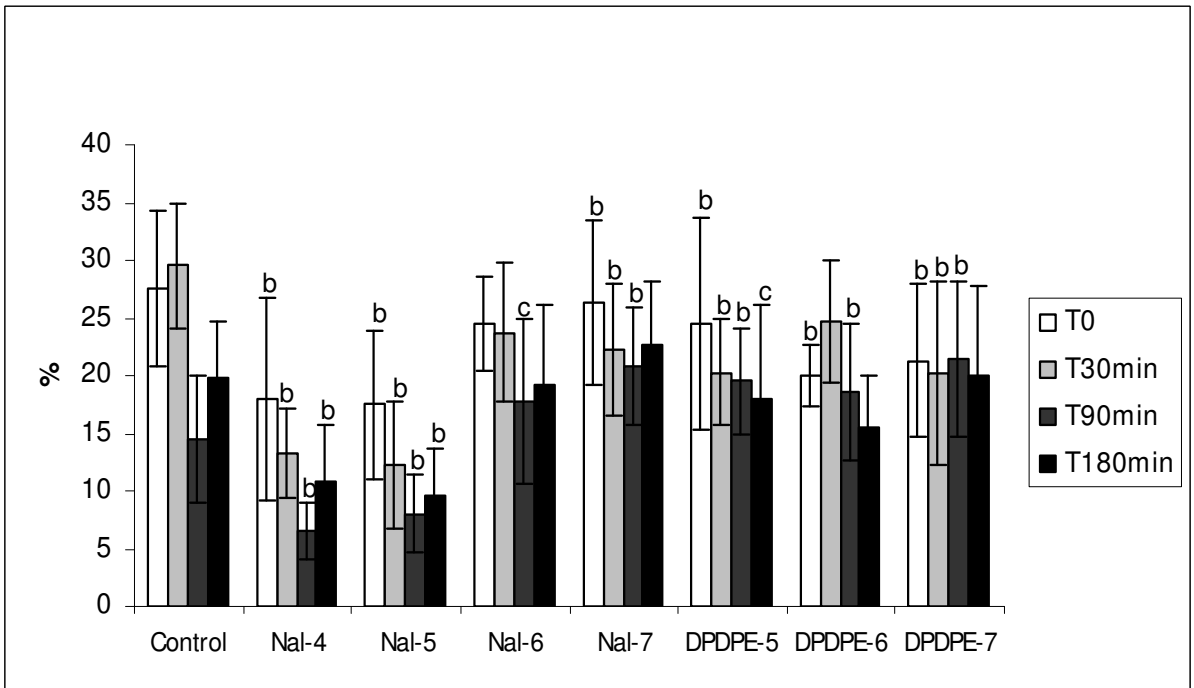

Supplement: MOESM3 [file 9568628]
